# Thoracic Epidural Anesthesia with Ropivacaine Does Not Compromise the Tolerance of Acute Normovolemic Anemia in Pigs

Andreas Pape, M.D., Christian F. Weber, M.D., Ph.D., Mohammed Laout, M.D., Max Steche, M.D., Saskia Kutschker, M.D., Oliver Horn, M.D., Bernhard Zwissler, M.D., Ph.D., Oliver Habler, M.D., Ph.D.

## ABSTRACT

**Background:** The initial treatment of an acute blood loss with acellular fluids leads to the dilution of the red cell mass remaining in the vasculature, that is, to acute normovolemic anemia. Whether the compensation and, thus, the tolerance of acute anemia, are affected by sympathetic block induced by thoracic epidural anesthesia has not yet been investigated.

**Methods:** Eighteen anesthetized and mechanically ventilated pigs were instrumented with thoracic epidural catheters and randomly assigned to receive an epidural injection of either 5-ml ropivacaine 0.2% ( $n = 9$ ) aiming for a Th5–Th10 block or saline ( $n = 9$ ) followed by continuous epidural infusion of 5 ml/h of either fluid. Subsequently, acute normovolemic anemia was induced by replacement of whole blood with 6% hydroxyethyl starch solution until a “critical” limitation of oxygen transport capacity was reached as indicated by a sudden decrease in oxygen consumption. The critical hemoglobin concentration quantified at this time point was the primary endpoint; secondary endpoints were hemodynamic and oxygen transport parameters.

**Results:** Thoracic epidural anesthesia elicited only a moderate decrease in mean arterial pressure and cardiac index and a transient decrease in oxygen extraction ratio. During progressive anemia, the compensatory increases in cardiac index and oxygen extraction ratio were not compromised by thoracic epidural anesthesia. Critical hemoglobin concentration was reached at identical levels in both groups (ropivacaine group:  $2.5 \pm 0.6$  g/dl, saline group:  $2.5 \pm 0.6$  g/dl).

**Conclusion:** Thoracic epidural anesthesia with ropivacaine 0.2% does not decrease the tolerance to acute normovolemic anemia in healthy pigs. The hemodynamic compensation of acute anemia is fully preserved despite sympathetic block, and the critical hemoglobin concentration remains unaffected. (*ANESTHESIOLOGY* 2014; 121:765-72)

THORACIC epidural anesthesia (TEA) has become an integral part of the anesthetic management of major surgery (e.g., abdominal, thoracic, or urologic surgery). The initial treatment of surgical blood loss usually consists of the infusion of acellular fluids to maintain normovolemia. The consequence is a dilution of the red cell mass remaining in the vascular system (acute normovolemic anemia). In this context, the term “anemia tolerance” refers to (1) the patient’s physiologic potential to tolerate even profound stages of acute anemia, and (2) the anesthesiologist’s intention to accept low hemoglobin concentrations to avoid premature and unnecessary transfusions of allogeneic blood products.<sup>1</sup>

As a result of the organism’s tolerance to anemia, tissue oxygenation is maintained, although oxygen transport capacity decreases progressively with dilutional anemia. At physiologic hemoglobin concentrations, oxygen supply to the tissues ( $\text{DO}_2$ ) exceeds total body oxygen demand—reflected by oxygen consumption ( $\text{VO}_2$ ) under rest conditions—by the factor three to four.<sup>2</sup> Therefore, oxygen supply to the tissues is sufficient to meet demand over a wide range of hemoglobin concentrations. As a consequence,  $\text{VO}_2$  remains constant, even when  $\text{DO}_2$  decreases with falling hemoglobin

### What We Already Know about This Topic

- Thoracic epidural anesthesia produces a marked reduction in sympathetic tone
- The effect of reduction in sympathetic tone on the tolerance to acute anemia is unknown

### What This Article Tells Us That Is New

- Thoracic epidural anesthesia does not decrease the tolerance to acute normovolemic anemia in healthy pigs
- The hemodynamic compensation of acute anemia is fully preserved, despite sympathetic block

concentrations (supply independency of  $\text{VO}_2$ , see fig. 1). Acute anemia is essentially compensated by increases in cardiac output and arteriovenous oxygen extraction,<sup>3</sup> the latter occurring to a variable extent within different organs.<sup>4</sup> When these compensatory mechanisms are exhausted (i.e., when cardiac output and oxygen extraction cannot be further increased), the amount of oxygen delivered to the tissues becomes insufficient to meet demand and  $\text{VO}_2$  starts to decline (supply dependency of  $\text{VO}_2$ ).<sup>5,6</sup> The hemoglobin concentration corresponding with the sudden decrease in

Submitted for publication February 27, 2014. Accepted for publication May 13, 2014. From the Department of Anesthesiology, Intensive-Care Medicine and Pain Therapy, University Hospital Frankfurt, Frankfurt am Main, Germany (A.P., C.F.W., M.L., M.S., S.K., O. Horn); Clinic of Anesthesiology, Ludwig Maximilians University Hospital, Munich, Germany (B.Z.); and Clinic of Anesthesiology, Surgical Intensive Care Medicine and Pain Management, Krankenhaus Nordwest, Frankfurt, Germany (O. Habler).

Copyright © 2014, the American Society of Anesthesiologists, Inc. Lippincott Williams & Wilkins. *Anesthesiology* 2014; 121:765-72

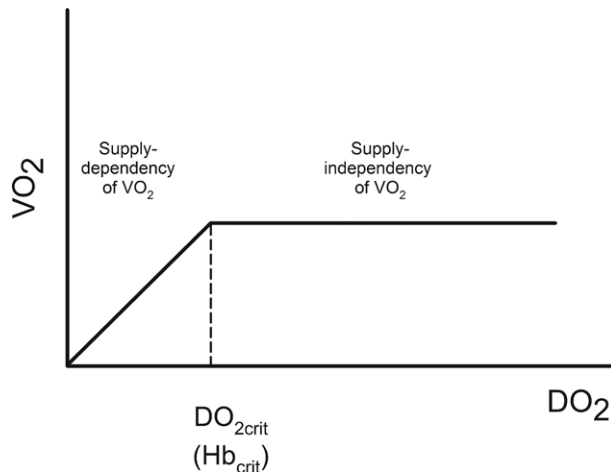

**Fig. 1.** Schematic representation of the relationship between oxygen consumption ( $\text{VO}_2$ ) and oxygen delivery ( $\text{DO}_2$ ). Physiologically,  $\text{DO}_2$  amounts the three- to four-fold of  $\text{VO}_2$ . Over a long period,  $\text{VO}_2$  remains independent on  $\text{DO}_2$  despite the anemia-related decrease in  $\text{DO}_2$ . A critical hemoglobin concentration ( $\text{Hb}_{\text{crit}}$ ) is reached, when  $\text{DO}_2$  falls short of the actual oxygen demand and the compensation of acute anemia (*i.e.*, increases in cardiac output and oxygen extraction) begins to fail. As a consequence,  $\text{VO}_2$  begins to decrease (onset of supply dependency of  $\text{VO}_2$ ).

$\text{VO}_2$  is referred to as the “critical” hemoglobin concentration ( $\text{Hb}_{\text{crit}}$ ) and reflects the individual limit of an organism’s tolerance to anemia.<sup>7</sup>

Aside from analgesic effects, sympathetic block produced by TEA has been demonstrated to optimize myocardial and splanchnic oxygen balances and is therefore purported to be cardioprotective, particularly in high-risk patients.<sup>8</sup> On the contrary, thoracic sympathetic nerve block may result in bradycardia, vasodilation, and hypotension and, thus, in reduced cardiovascular performance. Hence, we hypothesized that (1) the sympathetic nerve block elicited by TEA might compromise hemodynamic compensation and, therefore, the tolerance to acute anemia, and (2)  $\text{Hb}_{\text{crit}}$  would be met at higher hemoglobin levels than in individuals not subjected to TEA.

## Materials and Methods

After approval by the local governmental review board (Department for veterinary affairs/V54, Regional Council Darmstadt, Germany), experiments were carried out in 18 healthy farm-bred pigs of either sex (body weight  $23.8 \pm 1.9$  kg). All animals received care in compliance with the Guide for the Use of Laboratory Animals.

### Anesthesia and Ventilation

Twelve hours prior to the experiments, animals were denied food but had free access to water. After intramuscular premedication with ketamine (10 mg/kg) and midazolam (1 mg/kg), anesthesia was induced by intravenous injection of propofol (3 mg/kg) and fentanyl (30  $\mu\text{g/kg}$ ) and maintained by continuous infusion of propofol (160  $\mu\text{g}\cdot\text{kg}^{-1}\cdot\text{min}^{-1}$ ), fentanyl

(0.8  $\mu\text{g}\cdot\text{kg}^{-1}\cdot\text{min}^{-1}$ ), and midazolam (10  $\mu\text{g}\cdot\text{kg}^{-1}\cdot\text{min}^{-1}$ ). To facilitate intubation and mechanical ventilation, muscular paralysis was achieved with pancuronium bromide (bolus injection 200  $\mu\text{g/kg}$  followed by continuous infusion of 130  $\mu\text{g}\cdot\text{kg}^{-1}\cdot\text{min}^{-1}$ ). Estimated fluid losses were replaced with Ringer’s solution (3  $\text{ml}\cdot\text{kg}^{-1}\cdot\text{h}^{-1}$ ). The trade names of all anesthetic drugs applied are listed in the appendix.

Animals were orotracheally intubated and ventilated with a Servo 900B ventilator (Siemens-Elema, Solna, Sweden;  $\text{FIO}_2$  0.21, 14 cycles/min, positive end-expiratory pressure 5 cm  $\text{H}_2\text{O}$ ). Tidal volume was individually adjusted to provide arterial normocapnia and was then maintained throughout the entire protocol.

### Instrumentation and Monitoring

**Epidural Catheter Insertion.** After induction of anesthesia, animals were placed in the prone position for insertion of an epidural catheter. The fifth and the tenth thoracic vertebrae and the eighth interspace (Th8/9) were identified using fluoroscopy, and the borders of the dermatomes Th5 and Th12 were marked. The eighth interspace was surgically dissected under sterile conditions (resection of the interspinous ligaments and the spinal process of the eighth vertebra). The ligamentum flavum was visually identified, an 18-G Tuohy needle (Braun, Melsungen, Germany) was carefully advanced into the epidural space, and a 20-G epidural catheter was inserted for 5 cm. The catheter was fixed in this position before the incision was closed.

**Hemodynamic Monitoring.** Subsequently, animals were placed in the supine position, and a five-lead electrocardiogram (II, V5) was placed. A central venous catheter (Arrow, Reading, PA) was inserted into the cranial vena cava, and a Swan-Ganz catheter (Baxter, Irvine, CA) was floated into a pulmonary arterial branch for monitoring of pulmonary arterial pressures and withdrawal of mixed venous blood samples. A 6-F introducer sheath was inserted into the right femoral artery and vein, respectively. A thermodilution catheter (Pulsion, Munich, Germany) was placed into the left femoral artery for continuous measurement of arterial blood pressure and cardiac output. Ambient temperature was kept constant at 23°C, and body core temperature was monitored during the entire protocol.

### Experimental Protocol

After completion of instrumentation, a 60-min stabilization period was allowed to elapse to achieve stable baseline conditions. Upon recording the first data set (“Baseline”), animals were randomized to receive an epidural bolus injection of either 5 ml ropivacaine 0.2% or normal saline (ROP group,  $n = 9$  *vs.* SAL group,  $n = 9$ ). The investigator remained blinded until the completion of the epidural injection.

The intended spread of sympathetic block was Th5–10. If necessary, additional 1-ml boluses of ropivacaine were injected to establish this degree of sympathetic block; animals of the SAL group did not receive further epidural bolus

injections. For maintenance of the TEA level, a continuous epidural infusion of ropivacaine (5 ml/h) was initiated (animals of the SAL group received the corresponding volume of normal saline) and the second data set ("TEA") was recorded.

As a measure of sympathetic block, skin temperature was assessed before and 30 min after epidural injection by infrared thermometry, a method that has been described elsewhere.<sup>9</sup> Using a handheld infrared thermometer (Micro-Epsilon Messtechnik, Ortenburg, Germany), skin temperature was measured along the right and left anterior axillary lines in the dermatomes Th5–Th10 and on two reference points on the surface of the lower abdomen below Th12. Within each dermatome, a difference in temperature of at least 0.5°C compared to the reference points was considered to indicate a sympathetic block.

Subsequently, a hemodilution protocol was initiated with replacement of whole blood for hydroxyethyl starch (6% HES 130/0.42) in a 1:1 ratio. For precise synchronization of blood withdrawal with the HES infusion rate (1 mL·kg<sup>-1</sup>·min<sup>-1</sup>), a bidirectional precision pump (Harvard Apparatus, Holliston, MA) was used. Target parameter was the animal's individual Hb<sub>crit</sub>, which was assessed in an automated and investigator-independent manner (see the next section, "Assessment of Hb<sub>crit</sub>").

When Hb<sub>crit</sub> was reached, skin temperature was again scanned to verify the final level of the sympathetic block. Thereafter, the final data set was collected ("Hb<sub>crit</sub>") and animals were sacrificed by intracardiac injection of potassium chloride.

### Assessment of Hb<sub>crit</sub>

Hb<sub>crit</sub> correlates with critical limitation of DO<sub>2</sub> and marks the onset of total body oxygen supply dependency (see fig. 1). Using specific software (Delta-Crit-System),<sup>10</sup> the corresponding VO<sub>2</sub> decrease was detected by analysis of the VO<sub>2</sub> values obtained every 60 s. VO<sub>2</sub> was assessed with a metabolic monitor (Delta-Trac II, Datex-Engstrom, Helsinki, Finland). During the stabilization period, Delta-Crit-System incorporated the VO<sub>2</sub> values into a regression analysis and calculated the mean and SD for this baseline value. During the subsequent hemodilution period, VO<sub>2</sub> values were compared with the mean value baseline calculated by Delta-Crit-System. When three subsequent VO<sub>2</sub> values fell below a predefined level (three times the SD of the baseline regression line), a significant VO<sub>2</sub> decrease was signaled by visual and acoustic computer alerts and recorded.

### Measurements

Intravascular blood volume was determined at baseline using "whole-blood" dilution of the indocyanin green.<sup>11</sup> Measurements of hemodynamic and oxygen-derived parameters were performed at "Baseline," "TEA," and at "Hb<sub>crit</sub>."

Cardiovascular catheters were connected with pressure transducers and linked with a multichannel recorder (Hugo-Sachs, March-Hugstetten, Germany). All measurements

were recorded with a personal computer. Arterial and mixed venous blood samples were withdrawn for blood gas analyses and assessment of hemoglobin concentration (GEM-3000 and 682 CO-Oxymeter; Instrumentation Laboratory, Lexington, MA). Derivative parameters were calculated as described in the appendix.

### Statistics

Statistical analysis was performed with the SAS 9.3 software package (SAS Institute, Cary, NC). All data are presented as mean ± SD. The sample size was estimated according to our experience with previous studies using a similar experimental protocol. Distribution of data was assessed with the Shapiro-Wilk test. In the case of normal distribution, time effect on the different variables as well as differences between groups at the investigated time points were tested by a two-way repeated-measures ANOVA. *Post hoc* analysis of differences detected with ANOVA was performed with the Student–Newman–Keuls test. In the case of non-normal distribution, time effect on the parameters as well as between-group differences were tested by ANOVA on ranks. *Post hoc* analysis of differences detected with ANOVA on ranks was performed with the Tukey test. For all parameters, statistical significance was accepted at *P* value less than 0.05.

## Results

### Baseline Characteristics

There were no significant differences between the groups regarding body weight and all investigated parameters observed at baseline (see table 1).

### Effects of TEA

As a measure of sympathetic block, skin temperature was measured along the left and right anterior axillary lines within the dermatomes Th5–Th10 (see fig. 2). While the epidural injection of normal saline was void of any effects (see fig. 2, B and D), TEA with 0.2% ropivacaine elicited a sympathetic block of the segments Th5–Th10, which was reflected by an increase in skin temperature (see fig. 2, A and C).

As a consequence of sympathetic block, systemic vascular resistance index decreased by 34% (*P* = 0.06), which was accompanied by decreases in mean arterial pressure (MAP) by 17% (*P* = 0.07) and coronary perfusion pressure by 19% (*P* = 0.056) and a moderate increase of cardiac index (*P* = 0.32). Moreover, mixed venous oxygen saturation (SvO<sub>2</sub>) increased by 33% (*P* = 0.006), while oxygen extraction ratio (O<sub>2</sub>-ER) decreased by 45% (*P* = 0.002).

### Primary Endpoint: Hb<sub>crit</sub>

The induction of critical normovolemic anemia required the exchange of 106 ± 40% of circulating blood volume in the ROP group and 99 ± 31% in the SAL group. In both groups, Hb<sub>crit</sub> was met at 2.5 ± 0.6 g/dl (difference of means: -0.05, 95% confidence interval: -0.64, 0.53), so that no differences between the groups could be observed (*P* = 0.86).

**Table 1.** Hemodynamic and Oxygen-derived Parameters Assessed at Baseline, After Institution of TEA and at the Individual Hb<sub>crit</sub>

|                                                              | Baseline      | TEA         | Hb <sub>crit</sub> |
|--------------------------------------------------------------|---------------|-------------|--------------------|
| BVI, ml/kg                                                   |               |             |                    |
| ROP                                                          | 79 ± 17       |             |                    |
| SAL                                                          | 74 ± 12       |             |                    |
| Temp, °C                                                     |               |             |                    |
| ROP                                                          | 38.2 ± 1.0    | 38.1 ± 1.0  | 37.8 ± 1.1         |
| SAL                                                          | 38.2 ± 0.7    | 38.1 ± 0.6  | 37.9 ± 0.6         |
| HR, 1/min                                                    |               |             |                    |
| ROP                                                          | 78 ± 13       | 87 ± 14     | 122 ± 33*†         |
| SAL                                                          | 68 ± 13       | 70 ± 12     | 118 ± 22*†         |
| MAP, mmHg                                                    |               |             |                    |
| ROP                                                          | 91 ± 16       | 75 ± 9      | 57 ± 14*†          |
| SAL                                                          | 91 ± 13       | 82 ± 10     | 73 ± 16*‡          |
| MPAP, mmHg                                                   |               |             |                    |
| ROP                                                          | 18 ± 4        | 18 ± 4      | 21 ± 3*†           |
| SAL                                                          | 16 ± 3        | 18 ± 4      | 25 ± 4*†‡          |
| PCWP, mmHg                                                   |               |             |                    |
| ROP                                                          | 5 ± 3         | 3 ± 2       | 6 ± 3              |
| SAL                                                          | 4 ± 1         | 4 ± 1       | 6 ± 2              |
| CPP, mmHg                                                    |               |             |                    |
| ROP                                                          | 66 ± 14       | 53 ± 9      | 31 ± 12*†          |
| SAL                                                          | 69 ± 10       | 58 ± 8      | 44 ± 15*†          |
| CI, l·min <sup>-1</sup> ·m <sup>-2</sup>                     |               |             |                    |
| ROP                                                          | 3.1 ± 1.0     | 3.8 ± 1.0   | 6.6 ± 1.5*†        |
| SAL                                                          | 3.0 ± 0.6     | 3.5 ± 0.6   | 7.1 ± 0.8*†        |
| SVI, ml/m <sup>2</sup>                                       |               |             |                    |
| ROP                                                          | 40 ± 9        | 43 ± 7      | 57 ± 15*†          |
| SAL                                                          | 44 ± 3        | 50 ± 4      | 61 ± 10*†          |
| SVRI, dyn·s <sup>-1</sup> ·cm <sup>-5</sup> ·m <sup>-2</sup> |               |             |                    |
| ROP                                                          | 4,499 ± 1,560 | 2,967 ± 906 | 1,147 ± 339*†      |
| SAL                                                          | 4,213 ± 1,048 | 3,194 ± 747 | 1,377 ± 418*†      |
| PVRI, dyn·s <sup>-1</sup> ·cm <sup>-5</sup> ·m <sup>-2</sup> |               |             |                    |
| ROP                                                          | 674 ± 243     | 618 ± 224   | 405 ± 224          |
| SAL                                                          | 617 ± 144     | 614 ± 249   | 393 ± 90           |
| CaO <sub>2</sub> , ml/dl                                     |               |             |                    |
| ROP                                                          | 10.4 ± 1.0    | 9.8 ± 0.9   | 3.7 ± 0.8*†        |
| SAL                                                          | 10.5 ± 0.8    | 10.6 ± 0.9  | 3.7 ± 0.8*†        |
| Pao <sub>2</sub> , mmHg                                      |               |             |                    |
| ROP                                                          | 94 ± 8        | 97 ± 17     | 103 ± 18           |
| SAL                                                          | 95 ± 7        | 95 ± 6      | 92 ± 19            |
| Svo <sub>2</sub> , %                                         |               |             |                    |
| ROP                                                          | 43 ± 7        | 57 ± 8      | 43 ± 10†           |
| SAL                                                          | 47 ± 8        | 51 ± 8      | 41 ± 8             |
| DO <sub>2</sub> I, ml·m <sup>-2</sup> ·min <sup>-1</sup>     |               |             |                    |
| ROP                                                          | 320 ± 95      | 363 ± 78    | 237 ± 57*†         |
| SAL                                                          | 319 ± 78      | 372 ± 67    | 257 ± 38*†         |
| VO <sub>2</sub> I, ml·m <sup>-2</sup> ·min <sup>-1</sup>     |               |             |                    |
| ROP                                                          | 211 ± 31      | 208 ± 36    | 176 ± 26           |
| SAL                                                          | 195 ± 20      | 202 ± 23    | 184 ± 18           |
| O <sub>2</sub> -ER, %                                        |               |             |                    |
| ROP                                                          | 61 ± 16       | 42 ± 7*     | 59 ± 19†           |
| SAL                                                          | 52 ± 8        | 48 ± 9      | 61 ± 7†            |
| pH                                                           |               |             |                    |
| ROP                                                          | 7.54 ± 0.04   | 7.54 ± 0.06 | 7.47 ± 0.06*†      |
| SAL                                                          | 7.54 ± 0.05   | 7.54 ± 0.04 | 7.44 ± 0.05*†      |

(Continued)

**Table 1.** (Continued)

|             | Baseline  | TEA       | Hb <sub>crit</sub> |
|-------------|-----------|-----------|--------------------|
| BE, mmol/l  |           |           |                    |
| ROP         | 6.9 ± 3.0 | 7.1 ± 2.9 | 2.2 ± 3.5*†        |
| SAL         | 5.3 ± 2.9 | 6.3 ± 3.8 | 1.6 ± 3.2*†        |
| Lac, mmol/l |           |           |                    |
| ROP         | 2.0 ± 1.0 | 1.5 ± 0.5 | 2.0 ± 1.1          |
| SAL         | 1.8 ± 0.7 | 1.7 ± 0.8 | 1.5 ± 0.9          |

BVI, CI, DO<sub>2</sub>I, PVRI, SVI, SVRI, and VO<sub>2</sub>I are indexed to body surface area (see appendix).

\**P* < 0.05 versus baseline. †*P* < 0.05 versus TEA. ‡*P* < 0.05 ROP versus SAL. BE = base excess; BVI = blood volume index; CaO<sub>2</sub> = arterial oxygen content; CI = cardiac index; CPP = coronary perfusion pressure; DO<sub>2</sub>I = oxygen delivery index; Hb<sub>crit</sub> = critical hemoglobin concentration; HR = heart rate; Lac = lactate concentration; MAP = mean arterial pressure; MPAP = mean pulmonary arterial pressure; O<sub>2</sub>-ER = oxygen extraction ratio; Pao<sub>2</sub> = arterial oxygen tension; PCWP = pulmonary capillary occlusion pressure; pH = pH value; PVRI = pulmonary vascular resistance index; ROP = ropivacaine group (n = 9); SAL = saline group (n = 9); SVI = stroke volume index; SVO<sub>2</sub> = mixed-venous oxygen saturation; SVRI = systemic vascular resistance index; TEA = thoracic epidural anesthesia; Temp = body core temperature; VO<sub>2</sub>I = oxygen consumption index.

Hemoglobin concentrations are displayed at baseline, TEA, and Hb<sub>crit</sub> in figure 3.

### Secondary Endpoints: Hemodynamic and Oxygen-derived Parameters

During hemodilution, arterial oxygen content decreased proportionally with falling hemoglobin concentrations (*P* < 0.001 *vs.* TEA in either group). To compensate for acute anemia, cardiac index (CI) and O<sub>2</sub>-ER increased significantly in both groups. The increase of CI (*P* < 0.001 *vs.* TEA in either group) was achieved by increases in heart rate and stroke volume. Systemic vascular resistance index decreased by 61% and 56%, respectively (*P* < 0.001 *vs.* TEA in either group), as MAP decreased by 24% in the ROP group (*P* = 0.012) and by 11% in the SAL group (*P* = 0.33). Coronary perfusion pressure decreased by an average of 41% in the ROP group (*P* < 0.001) and by 24% in the SAL group (*P* = 0.039). At Hb<sub>crit</sub>, animals subjected to TEA were more hypotensive than controls, as indicated by lower values of mean arterial and pulmonary arterial pressures (*P* = 0.011 and *P* = 0.009 *vs.* SAL group, respectively).

Despite the compensatory increase of CI, oxygen delivery (DO<sub>2</sub>) decreased significantly (ROP group: *P* = 0.002, SAL group: *P* = 0.005) during progressive anemia. Hence, O<sub>2</sub>-ER increased by 40% in the ROP group (*P* = 0.03 *vs.* TEA) and by 27% in the SAL group (*P* = 0.037 *vs.* TEA). While base excess decreased in both groups (*P* = 0.018 and *P* = 0.017, respectively), lactate concentration was not yet elevated at Hb<sub>crit</sub> in either group.

### Discussion

The main finding of the present study is that sympathetic block (Th5–Th10) induced by TEA with 0.2% ropivacaine has no effect on the limit of tolerance to anemia. This was reflected by identical values of Hb<sub>crit</sub> in animals subjected to TEA compared to those that received epidural saline.



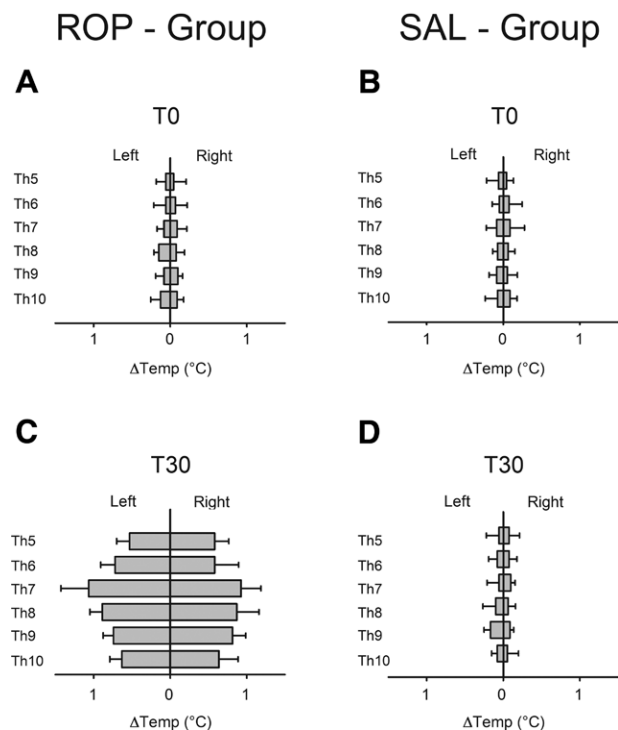

**Fig. 2.** Skin temperature measured along the left and right anterior axillary lines within the dermatomes Th5–Th10 in animals receiving epidural ropivacaine (ROP group; A and C) and saline (SAL-group; B and D), respectively. Data are presented as  $\Delta T$  relative to a reference point on the surface of the lower abdomen. Measurements were performed immediately after epidural injection of either fluid (T0, A and B) and after 30 min (T30, C and D). Within the different dermatomes, the injection of ropivacaine elicited a relative increase of skin temperature (B). In contrast, skin temperature was not altered after epidural injection of normal saline (D).

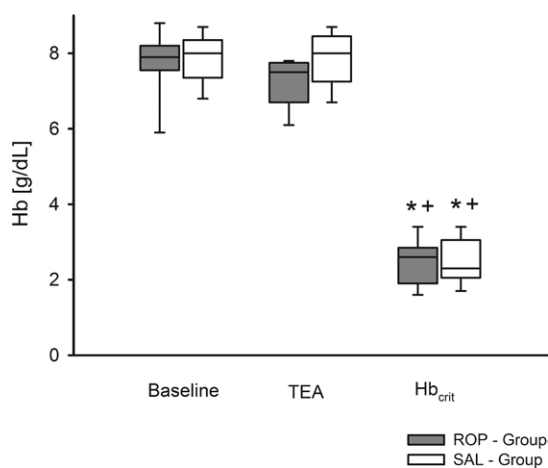

**Fig. 3.** Hemoglobin concentration assessed at baseline, after institution of thoracic epidural anesthesia (TEA), and at the individual critical hemoglobin concentration ( $Hb_{crit}$ ). The ropivacaine group (ROP,  $n = 9$ ) is displayed by gray boxes, the saline group (SAL,  $n = 9$ ) by white boxes. Beginning with a hemoglobin concentration of  $7.7 \pm 0.8$  g/dL (ROP group) and  $7.8 \pm 0.6$  g/dL (SAL group) at baseline,  $Hb_{crit}$  was met at  $2.5 \pm 0.6$  g/dL in both groups. \* $P < 0.05$  versus baseline. + $P < 0.05$  versus TEA.

$Hb_{crit}$  represents the ultimate limit of tolerance to anemia at the level of the whole organism.<sup>5,12</sup> In previous experimental studies, we could demonstrate that this critical limitation of oxygen supply was associated with 100% mortality, if no treatment (e.g., elevation of  $F_{IO_2}$ , transfusion of red blood cells, or infusion of artificial oxygen carriers) was initiated at  $Hb_{crit}$ .<sup>13–15</sup>  $Hb_{crit}$  has been chosen as the primary endpoint in a variety of studies investigating the impact of interventions on the limit of tolerance to acute anemia. As reflected by reduced values of  $Hb_{crit}$  (listed in table 2), tolerance to anemia was found to be increased by (1) hypothermia (moderate reduction of body core temperature reduces total body oxygen demand),<sup>16</sup> (2) hyperoxic ventilation (excellent bioavailability of oxygen physically dissolved in the plasma),<sup>13,17–19</sup> (3) infusion of norepinephrine (stabilization of coronary perfusion pressure during hemodilution)<sup>20</sup> or infusion of artificial oxygen carriers (maintenance of arterial oxygen content despite reduced hematocrit),<sup>15,21,22</sup> (4) deep neuromuscular block (lowering skeletal muscular oxygen demand),<sup>23</sup> and (5) use of colloidal rather than crystalloid fluids for volume replacement (maintenance of microvascular perfusion due to reduced extravasation rate).<sup>24</sup> In contrast, tolerance to anemia was reduced by (1) hypovolemia (reduction of microcirculatory oxygen supply), (2) profound anesthesia (pharmacologic reduction of cardiac output),<sup>25</sup> and (3) coronary artery disease (reduced coronary flow reserve).<sup>26</sup>

TEA today has become an integral part of perioperative care during and after major surgery, as it provides an effective analgesia.<sup>27</sup> TEA-related effects beyond analgesia (i.e., sympathetic block) have been demonstrated to improve

**Table 2.** Synopsis of Experimental Studies Investigating the Impact of Several Interventions on the Value of  $Hb_{crit}$

| Author                       | Species | Intervention                | $Hb_{crit}$ , g/dL | Endpoint                        |
|------------------------------|---------|-----------------------------|--------------------|---------------------------------|
| Perez-de-Sá <sup>16</sup>    | Pig     | Hypothermia                 | $2.3 \pm 0.2$      | Value of $Hb_{crit}$            |
| Pape et al. <sup>17,19</sup> | Pig     | Hyperoxia ( $F_{IO_2}$ 0.6) | $2.4 \pm 0.4$      | Value of $Hb_{crit}$            |
|                              |         | Hyperoxia ( $F_{IO_2}$ 1.0) | $1.3 \pm 0.3$      |                                 |
| Meier et al. <sup>13</sup>   | Pig     | Hyperoxia ( $F_{IO_2}$ 1.0) | $3.1 \pm 0.4$      | Survival time after $Hb_{crit}$ |
| Meier et al. <sup>20</sup>   | Pig     | Norepinephrine              | $2.6 \pm 0.4$      | Survival time after $Hb_{crit}$ |
| Pape et al. <sup>15</sup>    | Dog     | Artificial $O_2$ carrier    | $2.7 \pm 0.5$      | Survival time after $Hb_{crit}$ |
| Meisner et al. <sup>22</sup> | Pig     | Artificial $O_2$ carrier    | Hct 1.2%           | Value of $Hb_{crit}$            |
| Pape et al. <sup>23</sup>    | Pig     | Neuromuscular blockade      | $2.4 \pm 0.5$      | Value of $Hb_{crit}$            |
| Pape et al. <sup>24</sup>    | Pig     | Varying plasma substitute   | $2.1 \pm 0.4$      | Value of $Hb_{crit}$            |
| Van der Linden <sup>25</sup> | Dog     | Varying depth of anesthesia | $2.5 \pm 0.6$      | Value of $Hb_{crit}$            |

$Hb_{crit}$  = critical hemoglobin concentration;  $O_2$  = oxygen.

clinical outcome in patients undergoing cardiac and non-cardiac surgery.<sup>8</sup> Some meta-analyses<sup>28,29</sup> suggest a reduction of cardiopulmonary morbidity and mortality after major surgery performed with TEA. Moreover, TEA might improve intestinal perfusion and tissue oxygenation,<sup>30–32</sup> gut motility,<sup>33</sup> and anastomotic patency.<sup>34</sup> In experimental studies, hepatic<sup>35</sup> and intestinal<sup>36</sup> perfusion remained unaltered despite significant hypotension elicited by TEA.

However, experimental data regarding cardiovascular performance in pigs subjected to TEA are equivocal: While the hemodynamic response to cross-clamping of the thoracic aorta was not affected by sympathetic block,<sup>37</sup> the inotropic reserve of the right ventricle was compromised by TEA.<sup>38</sup>

We hypothesized that TEA might impair the hemodynamic compensation to acute normovolemic anemia resulting in a compromised tolerance to anemia. If so, this should lead to caution in use of TEA in high-blood-loss surgery to reduce transfusion.

Our data do not confirm this hypothesis. The assumed hemodynamic depression (*i.e.*, hypotension and limited cardiac output) was predominantly observed in experimental studies using higher concentrations of local anesthetics for TEA.<sup>31,35,36,39</sup> Contrary to our expectations, the present data suggest that hemodynamic compensation for acute anemia (*i.e.*, increase of cardiac output) was fully maintained during TEA with 0.2% ropivacaine.

Although the decrease in MAP was moderate after injection of ropivacaine, MAP and, thus, coronary perfusion pressure were significantly lower at  $Hb_{crit}$ , indicating that hypotension was more severe in animals subjected to TEA combined with profound anemia than in those experiencing acute anemia alone.

Our findings obtained in healthy pigs may not apply to patients with cardiovascular comorbidity (*e.g.*, coronary artery disease). In the presence of coronary arterial sclerosis, a decrease in coronary perfusion pressure may result in a critical limitation of myocardial oxygenation even at higher hemoglobin concentrations.

The spread of sympathetic block was assessed by measurement of skin temperature, which is an indirect method to assess sympathetic nerve activity. In contrast to direct techniques (*e.g.*, microneurography), thermometry is a simple and noninvasive method that allows a good chronological and spatial resolution of measurements.<sup>40</sup> Moreover, skin temperature assessed by infrared thermometry has been validated as a surrogate parameter of sympathetic activity in clinical<sup>9,40</sup> as well as in experimental<sup>38,41</sup> studies.

In the present study,  $Hb_{crit}$  was derived from mean total body oxygen consumption. The Delta-Trac II metabolic monitor provides a reliable method of  $VO_2$  measurement, which has been validated.<sup>10,42</sup> Although the assessment of  $Hb_{crit}$  at the level of the whole organism has been used to investigate the impact of interventions on tolerance to anemia, this approach neglects the limits of anemia tolerance on the cellular and the organ-specific level. While the

present study was not designed to address this point, results of a recent experimental study suggest that in the kidneys and in the intestine signs of tissue hypoxia occur before the critical limit of systemic oxygen supply is reached in anesthetized pigs subjected to acute normovolemic hemodilution.<sup>4</sup> In contrast, hepatic,<sup>35</sup> gastric,<sup>31</sup> and intestinal<sup>36</sup> tissue oxygenation were found unaltered despite significant systemic hypotension elicited by high-dose TEA.

Clinical data suggest that TEA improves myocardial oxygen balance in patients undergoing coronary bypass surgery, resulting in increased myocardial contractility.<sup>27,43</sup> This finding could have had a positive effect on tolerance to anemia by improving the cardiac response to acute anemia. In the present study, however, the institution of low-dose TEA did not affect CI, but elicited a decrease in  $O_2$ -ER and systemic vascular resistance index while  $VO_2$  remained constant, which may reflect improved tissue perfusion. Theoretically, this finding could also have contributed to an augmentation of tolerance to anemia, for example, due to augmentation of splanchnic tissue oxygenation.

Despite these potentially positive effects of TEA on anemia tolerance, the values of  $Hb_{crit}$  were identical in both groups, indicating that TEA did neither improve nor diminish tolerance to anemia. In particular, the compensatory increases in  $O_2$ -ER and CI during progressive anemia were unrestricted despite the presence of a sympathetic block.

In summary, our data indicate that the limit of tolerance to anemia was not compromised by TEA using 0.2% ropivacaine in healthy pigs. In clinical practice, however, blood transfusion should be initiated before this limit is reached, that is, before  $Hb_{crit}$  is reached, particularly since comorbid cardiovascular diseases or critical illness may severely restrict an individual's tolerance to acute anemia. Yet, a blood transfusion may occasionally be impossible, for example, having to "bridge" an acute blood loss until compatible blood products are available or refusal of blood transfusion for religious reasons. Even in these situations, where extremely low hemoglobin concentrations must be tolerated, essential compensatory mechanisms of acute anemia were maintained over a wide range of hemoglobin values despite sympathetic block.

## Conclusion

TEA with ropivacaine does not compromise the tolerance of acute anemia in healthy pigs, as essential compensatory mechanisms were fully preserved despite sympathetic block. Thus, TEA appears to be a reasonable choice even in major blood-loss surgery. However, whether the threshold for transfusion should be altered in those receiving TEA—particularly in the presence of cardiovascular comorbidity—remains to be elucidated.

## Acknowledgments

The authors thank Alf Theisen (D.V.M.), Waldemar Daut, and his team for their excellent animal care and Heinz Winkelmeier for his valuable technical assistance.

Dr. Theisen, Mr. Daut, and Mr. Winkelmeier are employed at the Central Research Facility, Goethe University, Frankfurt/Main, Germany. Sincere thanks are given to Hans-Joachim Wilke, D.E.A.A. (Department of Anesthesiology, Intensive Care Medicine and Pain Therapy, University Hospital Frankfurt, Frankfurt/Main, Germany), for language-editing the present manuscript.

Support was provided solely from institutional and/or departmental sources.

## Competing Interests

The authors declare no competing interests.

## Correspondence

Address correspondence to Dr. Pape: Department of Anesthesiology, Intensive-Care Medicine and Pain Therapy, University Hospital Frankfurt, Theodor Stern Kai 7, 60590 Frankfurt/Main, Germany. a.pape@em.uni-frankfurt.de. Information on purchasing reprints may be found at [www.anesthesiology.org](http://www.anesthesiology.org) or on the masthead page at the beginning of this issue. ANESTHESIOLOGY's articles are made freely accessible to all readers, for personal use only, 6 months from the cover date of the issue.

## Appendix. Drug-list and Calculated Parameters

For induction and maintenance of anaesthesia, the following drugs were applied:

Ketamine (Ketavet, Parke-Davis, Berlin, Germany)

Midazolam (Midazolam, Ratiopharm, Ulm, Germany)

Propofol (Brevimytal, Braun, Bad Melsungen, Germany)

Fentanyl (Fentanyl, Janssen, Neuss, Germany)

Pancuronium (Pancuronium, Curamed, Karlsruhe, Germany)

Balanced electrolyte solution (Tutofusin, Pharmacia, Erlangen, Germany)

6% HES 130/0.42 (Tetraspan, Braun, Melsungen, Germany).

For epidural anesthesia, ropivacaine (Naropin, AstraZeneca, Wedel, Germany) was applied.

Body surface area (BSA) was calculated according to Holt *et al.*<sup>44</sup>:

$$BSA = k \cdot BW^{\frac{2}{3}} \left( m^2 \right),$$

where  $BW$  = body weight (in kg) and  $k = 9$  (constant for the species pig).

Cardiac index was calculated as:

$$CI = \frac{CO}{BSA} \left( \frac{l}{m^2} \right),$$

where  $CO$  = cardiac output.

Stroke volume index was calculated as:

$$SVI = \frac{CI}{HR} \left( \frac{l}{m^2} \right),$$

where  $HR$  = heart rate.

Systemic and pulmonary vascular resistance indices were calculated as:

$$SVRI = \frac{(MAP - CVP) \cdot 79.9}{CI} \left( \frac{dyn \cdot s}{cm^5 \cdot m^2} \right) \text{ and}$$

$$PVRI = \frac{(MPAP - LVEDP) \cdot 79.9}{CI} \left( \frac{dyn \cdot s}{cm^5 \cdot m^2} \right),$$

where  $MAP$  = mean aortic pressure,  $CVP$  = central venous pressure,  $MPAP$  = mean pulmonary arterial pressure, and  $LVEDP$  = left ventricular end-diastolic pressure.

$O_2$  extraction ratio ( $O_2$ -ER) as calculated as follows:

$$O_2ER = \frac{CaO_2 - CvO_2}{CaO_2} \cdot 100(\%)$$

where  $CaO_2$  and  $CvO_2$  are arterial and mixed venous oxygen content. Coronary perfusion pressure was calculated as

$$CPP = DAP - PCWP,$$

where  $DAP$  = diastolic arterial pressure and  $PCWP$  = pulmonary capillary occlusion pressure.

## References

- Messmer KF: Acceptable hematocrit levels in surgical patients. *World J Surg* 1987; 11:41–6
- Madjdipour C, Spahn DR, Weiskopf RB: Anemia and perioperative red blood cell transfusion: A matter of tolerance. *Crit Care Med* 2006; 34(5 suppl):S102–8
- Habler OP, Messmer KF: The physiology of oxygen transport. *Transfus Sci* 1997; 18:425–35
- Lauscher P, Kertscho H, Schmidt O, Zimmermann R, Rosenberger P, Zacharowski K, Meier J: Determination of organ-specific anemia tolerance. *Crit Care Med* 2013; 41:1037–45
- Cain SM: Oxygen delivery and uptake in dogs during anemic and hypoxic hypoxia. *J Appl Physiol Respir Environ Exerc Physiol* 1977; 42:228–34
- Schumacker PT, Cain SM: The concept of a critical oxygen delivery. *Intensive Care Med* 1987; 13:223–9
- Pape A, Habler O: Alternatives to allogeneic blood transfusions. *Best Pract Res Clin Anaesthesiol* 2007; 21:221–39
- Freise H, Van Aken HK: Risks and benefits of thoracic epidural anaesthesia. *Br J Anaesth* 2011; 107:859–68
- Groeben H, Schäfer B, Pavlakovic G, Silvanus MT, Peters J: Lung function under high thoracic segmental epidural anesthesia with ropivacaine or bupivacaine in patients with severe obstructive pulmonary disease undergoing breast surgery. *ANESTHESIOLOGY* 2002; 96:536–41
- Meier JM, Woelkhammer S, Habler OP: The Deltacrit-System (DCS)—A new method for online-determination of critical  $VO_2$ -decline. *Comput Biol Med* 2003; 33: 395–405
- Haller M, Akbulut C, Brechtelsbauer H, Fett W, Briegel J, Finsterer U, Peter K: Determination of plasma volume with indocyanine green in man. *Life Sci* 1993; 53:1597–604
- De Backer D:  $VO_2/DO_2$  relationship: How to get rid of methodological pitfalls? *Intensive Care Med* 2000; 26:1719–22
- Meier J, Kemming GI, Kisch-Wedel H, Wölckhammer S, Habler OP: Hyperoxic ventilation reduces 6-hour mortality at the critical hemoglobin concentration. *ANESTHESIOLOGY* 2004; 100:70–6
- Meier J, Pape A, Lauscher P, Zwissler B, Habler O: Hyperoxia in lethal methemoglobinemia: Effects on oxygen transport,

- tissue oxygenation, and survival in pigs. *Crit Care Med* 2005; 33:1582–8
15. Pape A, Kertscho H, Meier J, Horn O, Laout M, Steche M, Lossen M, Theisen A, Zwissler B, Habler O: Improved short-term survival with polyethylene glycol modified hemoglobin liposomes in critical normovolemic anemia. *Intensive Care Med* 2008; 34:1534–43
  16. Perez-de-Sa V, Roscher R, Cunha-Goncalves D, Larsson A, Werner O: Mild hypothermia has minimal effects on the tolerance to severe progressive normovolemic anemia in Swine. *ANESTHESIOLOGY* 2002; 97:1189–97
  17. Pape A, Meier J, Kertscho H, Steche M, Laout M, Schwerdel F, Wedel M, Zwissler B, Habler O: Hyperoxic ventilation increases the tolerance of acute normovolemic anemia in anesthetized pigs. *Crit Care Med* 2006; 34:1475–82
  18. Kemming GI, Meisner FG, Kleen M, Meier JM, Tillmanns J, Hutter JW, Wojtczyk CJ, Packert KB, Bottino D, Habler OP: Hyperoxic ventilation at the critical haematocrit. *Resuscitation* 2003; 56:289–97
  19. Pape A, Steche M, Laout M, Wedel M, Schwerdel F, Weber CF, Zwissler B, Habler O: The limit of anemia tolerance during hyperoxic ventilation with pure oxygen in anesthetized domestic pigs. *Eur Surg Res* 2013; 51:156–69
  20. Meier J, Pape A, Loniewska D, Lauscher P, Kertscho H, Zwissler B, Habler O: Norepinephrine increases tolerance to acute anemia. *Crit Care Med* 2007; 35:1484–92
  21. Habler OP, Kleen MS, Hutter JW, Podtschaske AH, Tiede M, Kemming GI, Welte MV, Corso CO, Batra S, Keipert PE, Faithfull NS, Messmer KF: Hemodilution and intravenous perflubron emulsion as an alternative to blood transfusion: Effects on tissue oxygenation during profound hemodilution in anesthetized dogs. *Transfusion* 1998; 38:145–55
  22. Meisner FG, Kemming GI, Habler OP, Kleen MS, Tillmanns JH, Hutter JW, Bottino DA, Thein E, Meier JM, Wojtczyk CJ, Pape A, Messmer K: Diaspirin crosslinked hemoglobin enables extreme hemodilution beyond the critical hematocrit. *Crit Care Med* 2001; 29:829–38
  23. Pape A, Kertscho H, Stein P, Lossen M, Horn O, Kutschker S, Zwissler B, Habler O: Neuromuscular blockade with rocuronium bromide increases the tolerance of acute normovolemic anemia in anesthetized pigs. *Eur Surg Res* 2012; 48:16–25
  24. Pape A, Kutschker S, Kertscho H, Stein P, Horn O, Lossen M, Zwissler B, Habler O: The choice of the intravenous fluid influences the tolerance of acute normovolemic anemia in anesthetized domestic pigs. *Crit Care* 2012; 16:R69
  25. Van der Linden P, De Hert S, Mathieu N, Degroote F, Schmartz D, Zhang H, Vincent JL: Tolerance to acute isovolemic hemodilution. Effect of anesthetic depth. *ANESTHESIOLOGY* 2003; 99:97–104
  26. Levy PS, Kim SJ, Eckel PK, Chavez R, Ismail EF, Gould SA, Ramez Salem M, Crystal GJ: Limit to cardiac compensation during acute isovolemic hemodilution: Influence of coronary stenosis. *Am J Physiol* 1993; 265(1 pt 2):H340–9
  27. Waurick R, Van Aken H: Update in thoracic epidural anaesthesia. *Best Pract Res Clin Anaesthesiol* 2005; 19:201–13
  28. Wijeyesundera DN, Beattie WS, Austin PC, Hux JE, Laupacis A: Epidural anaesthesia and survival after intermediate-to-high risk non-cardiac surgery: A population-based cohort study. *Lancet* 2008; 372:562–9
  29. Beattie WS, Badner NH, Choi P: Epidural analgesia reduces postoperative myocardial infarction: A meta-analysis. *Anesth Analg* 2001; 93:853–8
  30. Daudel F, Freise H, Westphal M, Stubbe HD, Lauer S, Bone HG, Van Aken H, Sielenkämper AW: Continuous thoracic epidural anesthesia improves gut mucosal microcirculation in rats with sepsis. *Shock* 2007; 28:610–4
  31. Schwarte LA, Picker O, Höhne C, Fournell A, Scheeren TW: Effects of thoracic epidural anaesthesia on microvascular gastric mucosal oxygenation in physiological and compromised circulatory conditions in dogs. *Br J Anaesth* 2004; 93:552–9
  32. Kabon B, Fleischmann E, Treschan T, Taguchi A, Kapral S, Kurz A: Thoracic epidural anesthesia increases tissue oxygenation during major abdominal surgery. *Anesth Analg* 2003; 97:1812–7
  33. Blumenthal S, Min K, Nadig M, Borgeat A: Double epidural catheter with ropivacaine *versus* intravenous morphine: A comparison for postoperative analgesia after scoliosis correction surgery. *ANESTHESIOLOGY* 2005; 102:175–80
  34. Michelet P, D'Journo XB, Roch A, Papazian L, Ragni J, Thomas P, Auffray JP: Perioperative risk factors for anastomotic leakage after esophagectomy: Influence of thoracic epidural analgesia. *Chest* 2005; 128:3461–6
  35. Vagts DA, Iber T, Puccini M, Szabo B, Haberstroh J, Villinger F, Geiger K, Nöldge-Schomburg GF: The effects of thoracic epidural anesthesia on hepatic perfusion and oxygenation in healthy pigs during general anesthesia and surgical stress. *Anesth Analg* 2003; 97:1824–32
  36. Vagts DA, Iber T, Szabo B, Haberstroh J, Reising K, Puccini M, Geiger K, Nöldge-Schomburg GF: Effects of epidural anaesthesia on intestinal oxygenation in pigs. *Br J Anaesth* 2003; 90:212–20
  37. Aadahl P, Saether OD, Stenseth R, Myhre HO: Haemodynamic effects of thoracic epidural anaesthesia during proximal aortic cross-clamping in pigs. *Acta Anaesthesiol Scand* 1995; 39:23–7
  38. Missant C, Claus P, Rex S, Wouters PF: Differential effects of lumbar and thoracic epidural anaesthesia on the haemodynamic response to acute right ventricular pressure overload. *Br J Anaesth* 2010; 104:143–9
  39. Schwarte LA, Fournell A, van Bommel J, Ince C: Redistribution of intestinal microcirculatory oxygenation during acute hemodilution in pigs. *J Appl Physiol* (1985) 2005; 98:1070–5
  40. Freise H, Meissner A, Lauer S, Ellger B, Radke R, Bruewer M, Brodner G, Van Aken HK, Sielenkämper AW, Fischer LG: Thoracic epidural analgesia with low concentration of bupivacaine induces thoracic and lumbar sympathetic block: A randomized, double-blind clinical trial. *ANESTHESIOLOGY* 2008; 109:1107–12
  41. Peters J, Breuksch E, Kousoulis L, Krossa M, Arndt JO: Regional skin temperatures associated with total sympathetic blockade in conscious dogs. *Br J Anaesth* 1988; 61:617–24
  42. Meriläinen PT: Metabolic monitor. *Int J Clin Monit Comput* 1987; 4:167–77
  43. Berendes E, Schmidt C, Van Aken H, Hartlage MG, Wirtz S, Reinecke H, Rothenburger M, Scheld HH, Schlüter B, Brodner G, Walter M: Reversible cardiac sympathectomy by high thoracic epidural anesthesia improves regional left ventricular function in patients undergoing coronary artery bypass grafting: a randomized trial. *Arch Surg* 2003; 138:1283–90
  44. Holt JP, Rhode EA, Kines H: Ventricular volumes and body weight in mammals. *Am J Physiol* 1968; 215:704–15
